# Supplementary material for: Miniaturized single-cell technologies for monoclonal antibody discovery
Source: Royal Society of Chemistry journal article supplement (doi:10.1039/d1lc00243k), 2021-01-01
Supplement: d1lc00243k1.pdf [file d1lc00243k1.pdf]

Table 1. Overview of the most relevant patents, found on Espacenet based on either the company name, the technology name or one of the inventors (founders). (\*): This is a platform, not a company.

| Title                                                                                                        | Publication nr                 | Publication date | Associated company      |
|--------------------------------------------------------------------------------------------------------------|--------------------------------|------------------|-------------------------|
| Microfluidic method for single cell analysis                                                                 | <a href="#">WO2019202135A1</a> | 2019-10-24       | HiFiBiO Therapeutics    |
| Method for analyzing and selecting a specific droplet among a plurality of droplets and associated apparatus | <a href="#">WO2018134323A1</a> | 2018-07-26       | HiFiBiO Therapeutics    |
| Particle sorting in a microfluidic system                                                                    | <a href="#">WO2019057794A1</a> | 2019-03-28       | HiFiBiO Therapeutics    |
| Microfluidic droplet detection and sorting                                                                   | <a href="#">WO2016174229A1</a> | 2016-11-03       | Velabs Therapeutics     |
| Methods for nano-scale single cell analysis                                                                  | <a href="#">EP2805769A1</a>    | 2014-11-26       | Velabs Therapeutics     |
| Droplet-based selection                                                                                      | <a href="#">WO2009011808A1</a> | 2009-01-22       | Velabs Therapeutics     |
| Microfluidic sorting device                                                                                  | <a href="#">WO2016151107A1</a> | 2016-09-29       | Velabs Therapeutics     |
| Microfluidic sorting devices and methods                                                                     | <a href="#">WO2018054975A1</a> | 2018-03-29       | Velabs Therapeutics     |
| Microfluidic device                                                                                          | <a href="#">WO2013037962A3</a> | 2013-05-30       | Velabs Therapeutics     |
| Microfluidic devices and systems                                                                             | <a href="#">WO2015015199A2</a> | 2015-02-05       | Sphere Fluidics         |
| Systems and methods                                                                                          | <a href="#">WO2016193758A1</a> | 2016-12-08       | Sphere Fluidics         |
| Microfluidic structures                                                                                      | <a href="#">WO2017046565A1</a> | 2017-03-23       | Sphere Fluidics         |
| Emulsion                                                                                                     | <a href="#">WO2015015198A3</a> | 2015-06-11       | Sphere Fluidics         |
| Droplet dispensing systems                                                                                   | <a href="#">WO2018234821A3</a> | 2020-04-22       | Sphere Fluidics         |
| Droplet sorting                                                                                              | <a href="#">WO2016024095A1</a> | 2016-02-18       | Sphere Fluidics         |
| Droplet processing methods and systems                                                                       | <a href="#">WO2020030903A1</a> | 2020-02-13       | Sphere Fluidics         |
| Method of screening a plurality of single secreting cells for functional activity                            | <a href="#">WO2013090404A2</a> | 2013-06-20       | Single Cell Technology  |
| Method of screening single cells for the production of biologically active agents                            | <a href="#">WO2009123762A3</a> | 2009-12-30       | Single Cell Technology  |
| Method of obtaining antibodies of interest and nucleotides encoding same                                     | <a href="#">WO2009123748A1</a> | 2009-10-08       | Single Cell Technology  |
| Methods for determining lymphocyte receptor chain pairs                                                      | <a href="#">WO2015176162A1</a> | 2015-11-26       | AbCellera               |
| Microfluidic devices and methods for use thereof in multicellular assays of secretion                        | <a href="#">WO2014153651A1</a> | 2014-10-02       | AbCellera               |
| System and method for microfluidic cell culture                                                              | <a href="#">US2020325431A1</a> | 2020-10-15       | AbCellera               |
| Methods for assaying cellular binding interactions                                                           | <a href="#">US2012015347A1</a> | 2012-01-19       | AbCellera               |
| Microfluidic cell trap and assay apparatus for high-throughput analysis                                      | <a href="#">WO2012162779A1</a> | 2012-12-06       | AbCellera               |
| Microfluidic sieve valve                                                                                     | <a href="#">WO2006060748A2</a> | 2006-06-08       | AbCellera               |
| Methods and systems for screening using microcapillary arrays                                                | <a href="#">WO2018111765A1</a> | 2018-06-21       | xCella Biosciences Inc. |
| Lateral loading of microcapillary arrays                                                                     | <a href="#">WO2020118106A1</a> | 2020-06-11       | xCella Biosciences Inc. |
| Multi-stage sample recovery system                                                                           | <a href="#">WO2018125832A1</a> | 2018-07-05       | xCella Biosciences Inc. |
| High-throughput absorbance measurements of samples in microcapillary arrays                                  | <a href="#">WO2018191180A1</a> | 2018-10-18       | xCella Biosciences Inc. |
| Direct clone analysis and selection technology                                                               | <a href="#">WO2012007537A1</a> | 2012-01-19       | DiCAST (*)              |
| Microsieve diagnostic device in the isolation and analysis of single cells                                   | <a href="#">US2017189907A1</a> | 2017-07-06       | VyCAP                   |
| Diagnostic device with a filtration membrane for on spot microscopic diagnostic analysis and methods         | <a href="#">NL1039638C2</a>    | 2013-12-04       | VyCAP                   |
| A microsieve diagnostic device in the isolation and analysis of single cells                                 | <a href="#">WO2013180567A3</a> | 2014-04-10       | VyCAP                   |
| Micro well plate to distribute single cells in single                                                        | <a href="#">NL1040089C2</a>    | 2014-09-15       | VyCAP                   |

|                                                                                                                                                         |                                |            |                 |
|---------------------------------------------------------------------------------------------------------------------------------------------------------|--------------------------------|------------|-----------------|
| wells, and methods to use such plate                                                                                                                    |                                |            |                 |
| Light sequencing and patterns for dielectrophoretic transport                                                                                           | <a href="#">US2017354969A1</a> | 2017-12-14 | Berkeley Lights |
| Exporting a selected group of micro-objects from a micro-fluidic device                                                                                 | <a href="#">WO2015061462A9</a> | 2015-07-23 | Berkeley Lights |
| Systems for operating electrokinetic devices                                                                                                            | <a href="#">WO2016094507A9</a> | 2016-08-11 | Berkeley Lights |
| Automated identification of assay areas in a microfluidic device and detection of assay positive areas based on rate of change of image light intensity | <a href="#">WO2016094522A1</a> | 2016-06-16 | Berkeley Lights |
| Automated detection and repositioning of micro-objects in microfluidic devices                                                                          | <a href="#">WO2016094459A3</a> | 2016-08-18 | Berkeley Lights |
| Circuit based optoelectronic tweezers                                                                                                                   | <a href="#">WO2014074367A1</a> | 2014-05-15 | Berkeley Lights |
| Capturing specific nucleic acid materials from individual biological cells in a micro-fluidic device                                                    | <a href="#">WO2015095623A1</a> | 2015-06-25 | Berkeley Lights |
| Methods for assaying binding affinity                                                                                                                   | <a href="#">WO2020056339A1</a> | 2020-03-19 | Berkeley Lights |
| Detecting cells secreting a protein of interest                                                                                                         | <a href="#">WO2014070783A1</a> | 2014-05-08 | Berkeley Lights |
| Pens for biological micro-objects                                                                                                                       | <a href="#">WO2014070873A1</a> | 2014-05-08 | Berkeley Lights |
| Microfluidic devices having isolation pens and methods of testing biological micro-objects with same                                                    | <a href="#">WO2015061497A1</a> | 2015-04-30 | Berkeley Lights |
| Actuated microfluidic structures for directed flow in a microfluidic device and methods of use thereof                                                  | <a href="#">WO2016094333A1</a> | 2016-06-16 | Berkeley Lights |
| Micro-Fluidic Devices for Assaying Biological Activity                                                                                                  | <a href="#">WO2015061506A8</a> | 2015-06-18 | Berkeley Lights |
| Movement and selection of micro-objects in a microfluidic apparatus                                                                                     | <a href="#">WO2016094715A3</a> | 2016-08-04 | Berkeley Lights |
| General functional assay                                                                                                                                | <a href="#">WO2019133874A1</a> | 2019-07-04 | Berkeley Lights |
| Outputting a droplet of liquid medium from a device for processing micro-objects in the medium                                                          | <a href="#">WO2013181288A8</a> | 2015-01-15 | Berkeley Lights |
| Automated detection and characterization of micro-objects in microfluidic devices                                                                       | <a href="#">WO2019232473A3</a> | 2020-01-16 | Berkeley Lights |
| Microfluidic reporter cell assay methods and kits thereof                                                                                               | <a href="#">US2021069698A1</a> | 2021-03-11 | Berkeley Lights |
| Methods, systems and kits for in-pen assays                                                                                                             | <a href="#">WO2017181135A3</a> | 2019-01-03 | Berkeley Lights |
| Automated detection and repositioning of micro-objects in microfluidic devices                                                                          | <a href="#">WO2018102748A1</a> | 2018-06-07 | Berkeley Lights |
| Methods for screening B cell lymphocytes                                                                                                                | <a href="#">WO2018076024A8</a> | 2018-07-26 | Berkeley Lights |
| Apparatuses, systems and methods for imaging micro-object                                                                                               | <a href="#">WO2018102747A1</a> | 2018-06-07 | Berkeley Lights |
| Microfluidic devices and kits and methods for use thereof                                                                                               | <a href="#">WO2017100347A1</a> | 2017-06-15 | Berkeley Lights |
| DNA barcode compositions and methods of in situ identification in a microfluidic device                                                                 | <a href="#">WO2018064640A9</a> | 2018-05-31 | Berkeley Lights |
| Single-sided light-actuated microfluidic device with integrated mesh ground                                                                             | <a href="#">WO2016090295A1</a> | 2016-06-09 | Berkeley Lights |
| Methods for assaying biological cells in a microfluidic device                                                                                          | <a href="#">WO2020092975A2</a> | 2020-05-07 | Berkeley Lights |
